# Supplementary material for: Move it or lose it: interspecific variation in risk response of pond-breeding anurans
Source: PeerJ. 2019 Jun 7;7:e6956. doi: 10.7717/peerj.6956 (PMC6557263; doi:10.7717/peerj.6956)
Supplement: Supplemental Information 3 [file peerj-07-6956-s003.xlsx]

## Sheet: Sheet1
Month	Location	Species	Behavior
1: June	1: Boundary	1: Cricket frog	1: Stationary
2: July	2: Edge	2: Green tree frog	2: Mobile-then-stationary
3: August	3: Middle	3: Leopard frog	3: Mobile
4: September
5: October
6: November
